# Supplementary material
Source: Springer Nature journal article supplement (https://www.springermedizin.de/resource/supplementary/12889_2012_4991_MOESM3_ESM.pdf/9493018)
Supplement: MOESM3 [file 9493018]

**2452 potentially relevant studies were retrieved**

**2398 papers were excluded by reviewing the title and/or the abstract**

**54 full text papers were retrieved assessed for eligibility**

**29 papers were excluded**

**25 papers were included in the review**

**26 studies did not meet the inclusion criteria**

**2 papers were conference proceedings**

**1 Study data was not extractable**
